1

2

3 **Nepotism masks evidence for reciprocity in cooperation networks**

4

5 Gerald G. Carter<sup>1,2</sup>, Gabriele Schino<sup>3</sup>, Damien Farine<sup>1,2</sup>

6

7 <sup>1</sup>Department of Collective Behaviour, Max Planck Institut für Ornithologie, Konstanz, Germany;

8 <sup>2</sup>Chair of Biodiversity and Collective Behaviour, Department of Biology, University of

9 Konstanz, Germany;

10 <sup>3</sup>Istituto di Scienze e Tecnologie della Cognizione, Consiglio Nazionale delle Ricerche, Rome,

11 Italy

12

13 **Keywords:** cooperation, kin discrimination, mandrills, macaques, vampire bats

14 The authors wish to be identified to the reviewers.

15 **Abstract**

16 Nepotism and reciprocity are not mutually exclusive explanations for cooperation; helping  
17 decisions can depend on both kinship cues and past reciprocal help. The importance of these two  
18 factors can therefore be difficult to disentangle with observational data. We developed a  
19 resampling procedure for inferring the statistical power to detect observational evidence of  
20 nepotism and reciprocity, and applied this procedure to simulated and real datasets. We simulated  
21 datasets resulting from perfect reciprocity, where the probability and duration of helping events  
22 from individual A to B equaled B to A. We also simulated varying degrees of simultaneous  
23 nepotism. We then assessed how nepotism and sampling effort influenced the probability of  
24 detecting evidence of reciprocity. We applied the same analysis to empirical data on food sharing  
25 in vampire bats and allogrooming in mandrills and Japanese macaques. Nepotism consistently  
26 masked evidence for reciprocity. With perfect reciprocity and imperfect nepotism, nepotism was  
27 more likely to be detected and overestimated. We explain the causes and consequences. To  
28 compare the relative importance of genetic and social ties, researchers should measure the relative  
29 reliability of both estimates. We provide R scripts to allow others to assess the reliability of  
30 kinship and reciprocal help estimates in their own datasets.

31

## 32 **Introduction**

33           An adaptive cooperative trait, such as a heritable propensity for helping others, is an  
34 investment that yields a net return for the actor's inclusive fitness by increasing direct fitness,  
35 indirect fitness, or both (Hamilton 1964; West et al. 2007a). In cooperative groups with limited  
36 dispersal, such as microbial biofilms and eusocial insect colonies, groupmates will typically be  
37 close kin and selection can favor indiscriminate cooperative investments (Cornwallis et al. 2009;  
38 Hamilton 1964; Kümmerli et al. 2009; Lehmann et al. 2007). In well-mixed populations however,  
39 indiscriminate cooperation will lead to less cooperative phenotypes gaining the fitness benefits of  
40 receiving help while paying lower costs by helping less, and this exploitation can result in an  
41 evolutionary tragedy of the commons (West et al. 2007a). Individuals can ensure indirect or direct  
42 fitness returns on their investments by preferentially helping closer kin, *nepotism* (e.g. Cornwallis  
43 et al. 2009; Griffin and West 2003) or more cooperative partners, *reciprocity* (Carter 2014;  
44 Dolivo and Taborsky 2015; e.g. Rutte and Taborsky 2008; Schino and Aureli 2017; Taborsky et  
45 al. 2016; Trivers 1971). Crucially, these strategies can coexist if helping decisions are influenced  
46 by both kinship and past experience of reciprocal help, and they can also interact if, for instance,  
47 the degree of reciprocity is greater or smaller among kin (Axelrod and Hamilton 1981; Trivers  
48 1971; Van Cleve and Akçay 2014). Evidence for nepotism and reciprocity can therefore be  
49 difficult to disentangle. In this paper we show that one should expect asymmetries in the accuracy  
50 of the estimates of kinship and helping rates, and these biases will lead nepotism to mask  
51 evidence of even perfect reciprocity. Given this phenomenon, we provide methods that help with  
52 interpreting the effects of kinship and reciprocal help in cooperation networks.

53           The claim of reciprocity is far more contentious than nepotism for any nonhuman species.  
54 Despite growing correlational and experimental evidence, there is still disagreement about  
55 whether reciprocity regulates cooperation in any nonhuman animal (Carter 2014; Clutton-Brock  
56 2009; Schino and Aureli 2017; Taborsky et al. 2016), but a primary reason for this debate is that  
57 authors do not agree on what the term 'reciprocity' means or should mean (Bshary and

58 Bergmüller 2008; Carter 2014; Lehmann and Keller 2006; Noë 2006; West et al. 2007b).  
59 Definitions of reciprocity (also called reciprocation, reciprocal altruism, reciprocal cooperation,  
60 contingent cooperation, and direct reciprocity) have varied between authors and sub-disciplines  
61 (Carter 2014). Although the original concept was quite broad (Trivers 1971), more narrow  
62 subsequent definitions of reciprocity restricted its general importance to humans (Carter 2014).  
63 For example, the term has been used to describe: a broad category of enforced mutual benefit  
64 (analogous to kin selection), a correlation between cooperation given and received across dyads  
65 or over time (analogous to kin-biased association), a conditional helping behavior that causes this  
66 correlation (analogous to nepotism), and a specific psychological mechanism that might cause  
67 this conditional behavior (analogous to phenotype matching)(Carter 2014). For our purposes here,  
68 we define *reciprocity* broadly as help given that is influenced by rates of help received (i.e.  
69 reciprocal help), where help can involve different behaviors integrated over short or long  
70 timespans. Reciprocity has been most evident in controlled experiments where helping rates are  
71 immediate responses to past help between partners without social bonds (Dolivo and Taborsky  
72 2015; Rutte and Taborsky 2008; Schweinfurth et al. 2017a; Schweinfurth and Taborsky 2018a;  
73 Taborsky et al. 2016). However, if individuals form enduring social relationships, they should  
74 integrate social experiences over long timespans and reciprocal help is expected to take multiple  
75 forms, such as allogrooming, food sharing, coalitionary support (Carter 2014; Jaeggi et al. 2013;  
76 Schino and Aureli 2017; Seyfarth and Cheney 2012). In this case, observed helping rates are a  
77 measure of an underlying causal relationship rather than the immediate cause of observed  
78 reciprocal help. Because mere correlations do not demonstrate reciprocity, we use the term  
79 *symmetry* for the observed correlation between rates of help given and received. Symmetry in  
80 helping is the most common observational evidence for reciprocity. Similarly, we use the term  
81 *nepotism* for help that is influenced by kinship cues, and we use the term *kinship bias* for the  
82 observed correlation between help given and kinship. Kinship bias is the most common  
83 observational evidence for nepotism.

84           Semantics aside, the importance of reciprocity is also contentious because it is difficult to  
85 test especially in the presence of nepotism. Moreover, kinship bias is considered sufficient  
86 evidence for nepotism, while symmetry, even in the absence of nepotism, is not sufficient  
87 evidence of reciprocity (Carter 2014). A demonstration of reciprocity requires experimentally  
88 manipulating helping rates and then measuring a change in reciprocal helping (Dolivo and  
89 Taborsky 2015; Fruteau et al. 2009; Krama et al. 2012; Krams et al. 2013; Krams et al. 2008;  
90 Rutte and Taborsky 2008; Schweinfurth and Taborsky 2018a). In such tests, kinship can be  
91 excluded as a factor by testing only nonkin. However, reciprocity in nature could also play a role  
92 in cooperation among kin (Jaeggi and Gurven 2013; Schino and Aureli 2010c; Schweinfurth and  
93 Taborsky 2018b; Taborsky et al. 2016; Wilkinson 1984; Wilkinson 1988). An experimental test  
94 of both nepotism and reciprocity therefore requires simultaneously manipulating cues to both  
95 kinship and past experience of cooperation (Schweinfurth and Taborsky 2018b; Zöttl et al. 2013).  
96 Given the logistical difficulty of this test, the vast majority of evidence for both reciprocity and  
97 nepotism is correlational (e.g. Carter and Wilkinson 2013; Schino and Aureli 2010c). In addition  
98 to nepotism and reciprocity not being mutually exclusive or independent, an additional challenge  
99 arises in observational studies because they are also not equally detectable.

100           In observational studies, nepotism will lead to collinearity between reciprocal help and  
101 kinship as predictors of helping rates. Due to inherent differences in sampling effort, kinship  
102 estimates will generally be more precise than estimates of helping rates (see discussion for  
103 details). As a consequence, the more precise estimate of the correlation between kinship and  
104 helping will often be over-estimated relative to the less precise estimate of the correlation  
105 between help given and received, and nepotism should tend to mask evidence of reciprocity in  
106 correlational datasets. To assess this idea, we developed a resampling procedure for inferring  
107 power to detect both kinship bias and symmetry in mixed-kinship groups. To simulate perfect  
108 reciprocity, we simulated data of helping events resulting from pairs of individuals that based  
109 their decisions to help on an unobserved history of past reciprocal help that is perfectly

110 symmetrical. We then systematically changed two variables: (1) the degree of nepotism and (2)  
111 the number of observed helping events. Finally, we used permutation and bootstrapping to assess  
112 how these two factors interactively influenced the probability of detecting evidence for  
113 reciprocity.

114 To demonstrate the application of our approach to empirical data, we applied the same  
115 permutation and bootstrapping procedures to three datasets where both kinship and reciprocal  
116 help are suspected to influence cooperative behavior: allogrooming in female mandrills  
117 (*Mandrillus sphinx*), allogrooming in female Japanese macaques (*Macaca fuscata*), and food  
118 sharing in female common vampire bats (*Desmodus rotundus*). Mandrills appear to form large  
119 groups structured by matriline (Abernethy et al. 2002; Bret et al. 2013), and show evidence for  
120 reciprocal allogrooming (Schino and Pellegrini 2009) and kin discrimination (Charpentier et al.  
121 2007; Levréro et al. 2015). Japanese macaques are nepotistic, have a despotic social network with  
122 a steep dominance hierarchy based largely on maternal kinship, and direct allogrooming to  
123 dominant individuals and consistently preferred partners (Balasubramaniam et al. 2018).  
124 Regurgitated food sharing in vampire bats has been a classic example of the possible co-  
125 occurrence of reciprocity and nepotism (Wilkinson 1984; Wilkinson 1988). We focus on  
126 cooperative interactions among females because females in all three species form matriline and  
127 interact with both kin and nonkin.

128 To test hypotheses and estimate Type I and Type II error rates with both simulated and  
129 real datasets, we combined subsampling with bootstrapping to generate resampled datasets and  
130 plot the changes in the slopes and detection rates for kinship bias and symmetry across varying  
131 levels of sampling effort. These plots show whether the relative roles of kinship and reciprocal  
132 help are either remaining ambiguous or becoming clearer with more data. To generate  
133 coefficients and p-values, we used a permutation test designed to deal with both non-  
134 independence in the data and collinearity between the predictors (Dekker et al. 2007). R scripts

135 are available online (Carter et al. 2018) so that readers can adapt them to their own observations  
136 of helping and kinship among humans or nonhuman animals.

137

## 138 **Methods**

### 139 *Inferring power and precision of symmetry and kinship bias*

140 To test if and how nepotism prevents the detection of reciprocity, we inferred the power  
141 to detect both kinship bias and symmetry in simulated and real datasets of various sizes. To infer  
142 power, we estimated how estimates of kinship bias and symmetry vary with an increasing number  
143 of observations (N). Note that N is the number of observed helping events not individuals. We  
144 began with about 20 equally-spaced steps of N, starting at N = 20 observations and with each  
145 next step adding about 5% of the total sample of observed interactions. For example, for a dataset  
146 of 500 observations we would have 20 sample size steps of N = 20, 45, 70, 95, 120 .... 500. At  
147 each step, we randomly sampled N observations from the total dataset. We sampled with  
148 replacement (bootstrapping) to avoid confounding smaller variances at larger samples sizes with  
149 smaller variances in our samples. We bootstrapped the datasets 1000 times at each sample size.  
150 For instance, at the first step, we randomly sampled 20 observations with replacement 1000  
151 times. To analyze the simulated data (described below), we created a different dataset of size N  
152 observations by sampling from the input probability distributions 1000 times (i.e. Monte Carlo  
153 simulation) rather than bootstrapping a single dataset 1000 times.

154 For each observed dataset, we extracted the observed coefficients of kinship and  
155 reciprocal help from a multiple regression quadratic assignment procedure permutation test with  
156 double semi-partialling (MRQAP-DSP, (Dekker et al. 2007)). We defined the response variable  
157 ‘help’ for individual A to B as the total of duration of help from A to B, divided by the total  
158 duration of help received by B for all times where A could have helped B. This measure controls  
159 for differences in sampling time, and current situational factors such as need (Farine 2015).  
160 ‘Reciprocal help’ for A to B is then defined as help from B to A. We applied a log transformation

161 to the empirical allogrooming and food sharing durations because they were lognormal. We z-  
162 transformed all variables to obtain standardized beta coefficients, so that an observed coefficient  
163 of X for kinship indicates that a one standard deviation increase in kinship predicts an increase of  
164 X standard deviations in help.

165 To calculate p-values for the observed coefficients, we used a network-level permutations  
166 (Farine 2017) randomizing each input variable independently using the standard approach from  
167 the MRQAP-DSP function in the R package ‘asnipe’ (Farine 2013). We used this procedure to  
168 generate one null coefficient from a randomized network for each observed coefficient, resulting  
169 in 1000 observed and 1000 paired null coefficient values for the two predictors, kinship and for  
170 reciprocal help, at each sample size step. At each sample size, we then calculated (1) the mean  
171 and 95% confidence interval (CI) for the observed coefficients, which are the observed symmetry  
172 and kinship bias estimates, (2) the mean and 95% CI for the null coefficients, which are the  
173 symmetry and kinship bias estimates expected under the null hypothesis, (3) the proportion of  
174 samples where the observed coefficient was greater than the paired null coefficient, which  
175 indicates if the effect is real using all the samples, and (4) the proportion of observed coefficients  
176 that were greater than 95% of the expected null coefficients, which indicates the power to detect  
177 an effect with one sample of a given size.

178

### 179 *Simulating data resulting from 100% reciprocity and 0-100% simultaneous nepotism*

180 We simulated 500 observations of help among 20 individuals. To simulate perfect  
181 reciprocity, we generated a network of reciprocal helping history, and set this to be perfectly  
182 symmetric across dyads, such that the helping history from A to B was always equal to helping  
183 history of B to A. We then created a dataset of 500 observed helping events by randomly  
184 sampling one individual as an actor and selecting a remaining individual as a recipient with a  
185 probability that was proportional to the helping history. The duration of help was equal to this  
186 symmetrical helping history. All observed helping was therefore determined by the symmetrical



187 helping history, which is not directly observable but that probabilistically informs the observed  
188 data.

189 To simulate nepotism as an additional behavior, we made the history of past reciprocal  
190 help correlate with kinship to varying degrees. To do this, we constructed helping history network  
191 as the combination of two independent matrices of random values from 0 to 0.5 representing the  
192 kinship and non-kinship components of the helping history for each dyad. Nepotism determines  
193 the degree to which kinship predicts the helping history, so we calculated ‘helping history ( $h$ ), as  
194 a combination of the kinship ( $r$ ) and non-kinship components ( $c$ ), weighted by a ‘nepotism  
195 coefficient’ ( $n$ ), which ranges from 0 to 1:

196

$$197 \quad h = nr + (1-n)c$$

198

199 The nepotism coefficient represents the degree to which past unobserved helping history  
200 correlated with kinship. We created populations where nepotism equaled either 0, 0.25, 0.5, 0.75,  
201 or 1. Increasing nepotism means a higher correlation between unobserved helping history and  
202 kinship (Table S1), so the observed correlations between observed help and kinship (i.e. kinship  
203 bias) will also increase. Finally, we added a step to ensure that all individuals were observed  
204 helping at least one other individual.

205 In sum, these simulations generate an observed set of helping events where individuals  
206 base their helping decisions entirely on an unobserved foundation of past reciprocal help.  
207 However, this reciprocity co-existed across a spectrum of nepotism from 0% nepotism, where  
208 helping rates are symmetrical and kinship played no role, to 100% nepotism, where helping was  
209 symmetrical but only occurred among kin, and the relative causal roles of reciprocal help and  
210 kinship are therefore unknown. Of course, there are many possible causes of symmetrical helping  
211 besides helping others based on reciprocal help. However, the point of this simulation is simply to

212 ask: If perfect reciprocity did exist among individuals that were also somewhat nepotistic, how  
213 likely are we to overestimate the evidence for kinship bias relative to reciprocal helping?

214

#### 215 *Real datasets*

216 We also applied this resampling procedure as a power analysis for three real datasets. The  
217 first two studies were conducted on mandrills and Japanese macaques housed at the Rome Zoo  
218 (Bioparco) in Italy. An observer recorded the duration of all female-female grooming episodes  
219 involving a focal subject, either as actor or recipient. All female subjects were available as  
220 potential grooming partners throughout the study. Kinship was based on maternal pedigrees. The  
221 first dataset contained 1703 observations of mandrill allogrooming collected between July 2014  
222 and June 2015 from 10 sexually mature female mandrills in a group that also included two mature  
223 males. A past study of six female mandrills from the same captive population found that  
224 allogrooming A to B predicted allogrooming B to A, when controlling for kinship (Schino and  
225 Aureli 2010c), or when controlling for kinship and rank and excluding recent reciprocal grooming  
226 (Schino and Pellegrini 2009).

227 The second dataset contained 737 observations of macaque allogrooming collected  
228 between April and November 1996 from 22 sexually mature female Japanese macaques in a  
229 group of 71 that also included mature males and juveniles. Similar to the mandrills, analyses of  
230 allogrooming in the same captive population of Japanese macaques found symmetry in female  
231 allogrooming, and also found that allogrooming predicted support in social conflicts when  
232 controlling for kinship, rank, or time spent in proximity (Schino et al. 2007), and allogrooming  
233 was better predicted by kinship than by grooming received (Schino and Aureli 2010c).

234 The third dataset included 408 regurgitated food-sharing donations among 15 female  
235 common vampire bats from previous studies where food sharing was induced by fasting a subject  
236 (for details, see Carter and Wilkinson 2013; Carter and Wilkinson 2015). Each donation size was  
237 estimated by the total seconds that the unfed subject licked the mouth of a fed groupmate.

238 Kinship was estimated using a maternal pedigree and maximum likelihood estimates applied to  
239 genotypes of 19 polymorphic microsatellite markers (for details see Carter and Wilkinson 2015).  
240 Past analyses of these same data found that food sharing was better predicted by reciprocal  
241 sharing than by kinship, when controlling for grooming and donor sex (Carter and Wilkinson  
242 2013a; Carter and Wilkinson 2013b), and this conclusion was supported by later experiments  
243 showing that the bats were attracted to the calls of nonkin donors more than non-donor kin  
244 (Carter and Wilkinson 2016) and that females that previously fed more nonkin were less affected  
245 by the removal of a donor from their food-sharing network (Carter et al. 2017).

246

#### 247 *Code availability*

248 Data and R code, including functions to apply the same procedure to other datasets, is  
249 available online at the *figshare* data repository (Carter et al. 2018a; Carter et al. 2018b).

250

## 251 **Results**

### 252 *Simulated data*

253 Nepotism reduced the ability to detect the perfect symmetry in helping that exists  
254 independent of kinship. The simulations were constructed such that reciprocal help played a more  
255 important role than kinship in determining helping rates at every level of nepotism up to 100%  
256 nepotism, where reciprocal help and kinship were completely confounded. Yet as nepotism  
257 increased above zero, permutation tests were more likely to incorrectly infer that nepotism was  
258 more important than reciprocity (Figure 1). The reason for this can be seen in the plots of the size  
259 and precision of the observed and null coefficient estimates over increased sampling effort  
260 (Figure S1-S5). As nepotism increased, so too did the collinearity between kinship and the  
261 observed reciprocal help (Figure S6). Compared to helping symmetry, the kinship bias estimates  
262 were less variable. Starting at 50% nepotism, kinship biases were estimated to be larger than  
263 symmetry even though the generative probabilities and the actual durations of helping were

264 always perfectly symmetrical (Figure 1). In these scenarios, where we know the real contribution  
265 of both kinship and reciprocal help as drivers of helping, we see that kinship bias was consistently  
266 overestimated relative to symmetry. At zero nepotism, estimates of symmetry in helping were  
267 still underpowered at 500 observations (Figure 1, see also Figure S7).

268

#### 269 *Real data*

270 Results with empirical data are consistent with expectations from the analysis of the  
271 simulated data. For female mandrill allogrooming, symmetry was eventually detected to be  
272 significantly greater than kinship bias but this required more than 1250 observations, and the  
273 power for either effect was similar across sampling efforts (Figure 2). A sample of 1703  
274 observations provided adequate power to detect both effects, but the relative effect size estimates  
275 of symmetry and kinship appear to still be diverging with more observations (Figure 2),  
276 suggesting that the relative contribution of nepotism may still be over-estimated despite this large  
277 sample size of helping events. For female macaque allogrooming, where nepotism is quite strong,  
278 a sample size of about 60 observations provided enough power to reliably detect a positive  
279 kinship bias, but the full set of 737 observations did not provide enough power to reliably detect  
280 positive symmetry (i.e. power < 80%, Figure 3). This highlights the combined impacts of greater  
281 nepotism and fewer helping events per dyad. For food sharing among female vampire bats,  
282 kinship bias is detected more reliably than symmetry at all sample sizes (Figure 3). The estimate  
283 of kinship bias is relatively stable at about 200 observations, but at 400 observations the estimate  
284 of symmetry is still increasing with additional sampling. There is enough power to detect positive  
285 kinship bias and symmetry, but power is lacking to reliably estimate the amount of symmetry  
286 (Figure 3). Together the plots from our simulations combined with those from the empirical  
287 datasets illustrate how and why detecting kinship bias and symmetry requires much less sampling  
288 effort than identifying their relative importance.

289

## 290 **Discussion**

### 291 *Why nepotism masks evidence for reciprocity*

292           If kinship and reciprocal help are simultaneous predictors of helping, then nepotism will  
293 often be easier to detect and overestimated relative to symmetry in helping rates. Looking at the  
294 simulation results of Figure 1, consider a scenario of 100 helping observations, where individuals  
295 are performing perfect reciprocity. At zero nepotism, symmetry will be detected (i.e. ‘statistically  
296 significant’) with a 50% probability, and nepotism will have a low rate of false positives. At 25%  
297 nepotism, however, a researcher is now equally likely to detect symmetry versus a kinship bias.  
298 At 50% nepotism, kinship bias further masks symmetry and the probability of correctly detecting  
299 symmetry drops to less than 25% and kinship bias is detected about 90% of the time. At 75% and  
300 100% nepotism, kinship bias is always detected while symmetry is usually not detected. Even if  
301 both effects are detected, the relative effect sizes give the clear but incorrect appearance that  
302 helping decisions were influenced more by kinship than by reciprocal help. In the 100% nepotism  
303 scenario where the symmetrical helping history and kinship are exactly equal, kinship bias is  
304 always detected, but with the same sampling effort in the 0% nepotism scenario, where helping is  
305 symmetrical and independent of kinship, there is only 50% power to detect evidence of  
306 reciprocity. Why does this happen?

307           Estimating a correlation or slope coefficient requires having accurate data on the  
308 predictor as well as the response variables. Cases with two highly correlated predictors  
309 (collinearity) will lead to imprecise estimates of both coefficients, making each effect harder to  
310 detect. More critically, the most precisely estimated predictor, in this case kinship, will often  
311 appear to have a relatively larger coefficient and to be more important, regardless of its true  
312 causal role. The joint contributions of nepotism and reciprocity create collinearity between the  
313 predictors kinship and reciprocal help, which weakens the power to detect either effect, and it  
314 also leads to masking of the reciprocal help effect at lower sampling efforts, because the precision  
315 of kinship estimates is independent of the number of helping events observed.

316 Genetic relatedness is becoming increasingly easy to measure compared to the history of  
317 helping interactions. Pedigrees can be supplemented or replaced by genetic or genomic data,  
318 which is becoming cheaper and easier to collect (Städle and Vigilant 2016), and the precision of  
319 marker-based relatedness estimates are often estimated by resampling methods. In contrast, the  
320 history of cooperation between any two individuals is often unknown. The existence and strength  
321 of a cooperative relationship must be estimated by sampling many helping events given and  
322 received (e.g. allogrooming, food sharing, or coalitionary support) to calculate dyadic helping  
323 rates. When such cooperative interactions are rare or difficult to observe, these dyadic helping  
324 rates will be imprecise measures of the true cooperative relationship between the individuals. For  
325 example, we might have observed A helping B, but never B helping A, despite the fact that B has  
326 helped A in the past, or may do so in the future. Such imprecision in the estimate of helping  
327 symmetry will have twice the effect on the ability to find support for reciprocity because it will  
328 affect both the predictor (how much B helps A) and the response (how much A helps B), whereas  
329 it affects kinship estimates only once through the response variable (how much A helps B). The  
330 sample size of helping observations does not affect the estimates of kinship, but it does determine  
331 the accuracy of the dyadic rates of help given and received. Fewer helping observations will  
332 directly impact estimates of symmetry but not kinship.

333 To give another example, if we observe only one sharing event for each dyad those data  
334 could be sufficient to detect and estimate an existing kinship bias (albeit the estimate might be  
335 poor), whereas we cannot use the same data to detect or estimate an existing symmetry in helping  
336 rates. If a cooperative relationship exists, then kinship estimates will generally be more precise  
337 than estimates of helping rates. Because the more precise estimate will be over-estimated relative  
338 to the less precise estimate, nepotism will tend to mask evidence of reciprocity.

339 This asymmetry in precision is compounded in larger study populations. The number of  
340 possible dyadic helping rates is almost the square of the number of individuals,  $n*(n-1)$ .  
341 Observing enough dyadic helping interactions to accurately estimate a cooperation network

342 (Farine and Strandburg-Peshkin 2015) is therefore a far greater challenge than estimating  
343 pairwise kinship among the same number of individuals. The former requires many unique  
344 behavioral samples per individual, whereas the latter requires applying the same panel of genetic  
345 markers to one genetic sample per individual. As population size increases, so too does the  
346 inequality between the effort required to estimate helping rates versus pairwise kinship across all  
347 dyads. As a result, the power to detect helping symmetry relative to kinship bias will almost  
348 always decrease with more individuals.

349       Even if kinship plays a less important role than reciprocal help, nepotism will mask some  
350 or all of the evidence of reciprocity, especially as the sample of helping events becomes smaller.  
351 This is important because observations of costly helping events, such as food sharing, are often  
352 quite rare. For example, more than 400 hours of focal sampling of wild vampire bats over 26  
353 months of fieldwork yielded 110 observations of regurgitated food sharing and only 21  
354 observations of non-maternal sharing between adults with known association and relatedness  
355 (Wilkinson 1984). Researchers studying meat sharing in chimpanzees observed an average only  
356 1.3 sharing episodes between adult male chimpanzees per successful hunt (Mitani and Watts  
357 2001). When captive capuchin monkeys were separated by mesh barrier and given opportunities  
358 to share food, observations of 9896 interactions over food yielded only 18 instances of apparent  
359 food sharing and 4 unambiguous cases of one monkey directly giving food to the other (de Waal  
360 1997a). More frequent interactions such as grooming are therefore useful for providing a window  
361 into cooperative relationships that may drive more costly helping decisions, but effect sizes based  
362 on these most frequent interactions are still underpowered with surprisingly large numbers of  
363 helping events (Figure 1).

364

365 *How to infer power to detect symmetry and kinship bias*

366       Given the presence of collinearity if both nepotism and reciprocity exist, one cannot  
367 interpret the standardized coefficients in the standard way (as the expected increase in helping

368 with an increase in kinship holding reciprocal help constant), nor can one be sure from the typical  
369 permutation test that the relative magnitude of the coefficients at a given sample size reflect their  
370 actual predictive importance, because the relative precision of the estimates will be unclear. One  
371 can, however, estimate the precision of helping symmetry through resampling. Researchers often  
372 use resampling to assess the reliability of genetic marker-based estimates of relatedness  
373 (Kalinowski et al. 2006; Queller and Goodnight 1989; Wang 2011). One can also use resampling  
374 to create similar confidence estimates for social relationships (Farine and Strandburg-Peshkin  
375 2015; Sánchez-Tójar et al. 2018).

376 Our resampling procedure allows one to determine how symmetry and kinship bias  
377 respond to increased sampling. Subsampling and bootstrapping generate confidence intervals and  
378 trajectories for each effect size with increasing sampling. By inspecting the resulting plots, one  
379 can infer if more power is needed to test a hypothesis about symmetry or kinship bias. For  
380 instance, if the coefficients are on a crossing trajectory, then more data are required before  
381 drawing any conclusions. If the trajectories are diverging, then more reliable conclusions can be  
382 drawn about which predictor is more important, but not by how much. If the trajectories are  
383 stable, this suggests that the precision of the estimate would not be improved with more sampling.  
384

#### 385 *Five other reasons why reciprocity is hard to detect*

386 Symmetrical helping rates in a kin-structured populations can be hard to detect for purely  
387 statistical reasons, but several biological factors can also make correlational evidence for  
388 reciprocity difficult to detect. First, unlike kinship, the helping rates between any two individuals  
389 can change during the course of a study. This is generally true for any measure of a social  
390 relationship such as dominance or association rate. The concept of symmetry as a correlation in  
391 helping rates across individuals rather than as a correlation in rates over time assumes the  
392 existence of a stable social relationship (Seyfarth and Cheney 2012), where stable helping rates  
393 are based on an extended history of past interactions that are likely to have occurred before the



394 study began (Carter 2014; Schino and Aureli 2009; Schino and Aureli 2010a; Schino and Aureli  
395 2010b). However, even when animals form such stable long-term bonds, social decisions are  
396 clearly influenced by immediate costs and benefits (Newton-Fisher and Kaburu 2017). For  
397 instance, one study reported that an alpha male chimpanzee was attacked and killed by his most  
398 strongly affiliated and most frequent grooming partner, that many observers might label as a  
399 ‘friend’ (Kaburu et al. 2013). Social relationships can not only change suddenly, but often  
400 asynchronously across dyads, meaning that defining a sampling period for helping rates can prove  
401 difficult.

402         Second, stable relationships are also expected to have a longer timescale for  
403 reciprocation, which makes symmetry more difficult to detect in a short timespan (Carter and  
404 Wilkinson 2013; de Waal 1997; Gomes and Boesch 2009; Gomes and Boesch 2011; Gomes et al.  
405 2008; Jaeggi et al. 2013; Sabbatini et al. 2012; Schino and Aureli 2017; Seyfarth and Cheney  
406 2012). Strongly bonded individuals show dyadic helping rates that are more predicted by a  
407 foundation of past events and less predicted by recent events, compared to weakly bonded  
408 individuals (de Waal 1997; Jaeggi et al. 2013; Schino and Aureli 2009; Seyfarth and Cheney  
409 1984; Seyfarth and Cheney 2012). If individuals invest in relationships for long-term benefits,  
410 then a strong social bond might only show symmetry over a year but not a month or week. Hence,  
411 greater social stability makes it harder to detect helping symmetry over short time periods,  
412 whereas lower social stability makes it harder to detect symmetry over long time periods. The  
413 relative importance of recent events versus longer-term past experience in driving decisions to  
414 cooperate is an open question for most behaviors and species.

415         Third, for any given relationship, the relative importance of reciprocity and nepotism can  
416 change over time. For example, the help invested by a mother in her two daughters when they are  
417 young might be 100% nepotistic and 0% reciprocal, with equal helping allocated to each  
418 daughter. However, when her daughters become adults, the mother’s investment might also be

419 influenced by each daughter's reciprocal investment in her, and she may have a stronger  
420 relationship with one daughter over another.

421 Fourth, reciprocity can be more difficult to detect than nepotism because cooperative  
422 returns can take different forms (Borgeaud and Bshary 2015; de Waal and Berger 2000; de Waal  
423 1997; Fruteau et al. 2009; Gomes and Boesch 2009; Gomes and Boesch 2011; Seyfarth and  
424 Cheney 1984). If each decision to help is based on a weighted sum of different forms of past help,  
425 then any one form of help might not show much symmetry. If reciprocity in a stable long-term  
426 relationship involves some form of 'emotional book-keeping' (Schino and Aureli 2009), then  
427 'grooming on Tuesday can create an emotional bond that causes meat sharing on Saturday  
428 afternoon' (p. 167, Seyfarth and Cheney 2012). Asymmetries in any one service are expected if  
429 subordinates groom more dominant individuals in exchange for tolerance (Borgeaud and Bshary  
430 2015; Port et al. 2009; Tiddi et al. 2011; Ventura et al. 2006), or if individuals adjust their  
431 grooming rates based on the ability of partners to provide food relative to others (Fruteau et al.  
432 2009). Such asymmetries play a key role in biological market theory (Noë and Hammerstein  
433 1994; Noë and Hammerstein 1995).

434 Finally, the degree of contingency in a reciprocal relationship may be more or less strict  
435 among kin. In other words, reciprocity and nepotism might interact. This occurs if the  
436 contingency between helping given and received differs between kin and nonkin. A negative  
437 interaction between contingency and kinship was observed in cooperatively breeding cichlids  
438 where dominants share their nests with subordinate helpers that must 'pay-to-stay', but  
439 subordinates nonkin help more than kin because dominants tolerate subordinate kin regardless of  
440 their degree of alloparental care (Zöttl et al. 2013). Such differences in reciprocity between kin  
441 and nonkin may also exist in primate long-term cooperative relationships, but they can only be  
442 detected through repeated manipulations of helping among both kin and nonkin.

443

444 *Experimental evidence for simultaneous nepotism and reciprocity*

445 To test the causal roles of reciprocity and nepotism, experiments must manipulate both  
446 the helping history and kinship cues that influence decisions to help. To our knowledge, this has  
447 only been accomplished once using an experimental paradigm where rats are trained to  
448 understand how to pull a bar to deliver a food reward to a partner rat. In a series of experiments,  
449 reciprocity was evident because decisions to pull for a partner were influenced by factors such as  
450 past food received or allogrooming received from the partner (Rutte and Taborsky 2008;  
451 Schweinfurth and Taborsky 2018a). To test for a simultaneous kinship effect, outbred wild-type  
452 male rats were separated from littermates, housed with non-kin, tested for an ability to recognize  
453 kin, and then tested in the same food-pulling task with partners that varied in both their past  
454 reciprocal help and kinship (Schweinfurth and Taborsky 2018b). The rats demonstrated kin  
455 discrimination by preferring to associate with unfamiliar kin over unfamiliar nonkin, but they did  
456 not show nepotism in the food pulling task; kinship did not increase food pulling nor did it  
457 change the symmetry of reciprocal pulling rates (Schweinfurth and Taborsky 2018b).

458

459 *When is nepotism harder to detect than symmetry?*

460 There are several conditions under which nepotism is unlikely to be detected. First, Type  
461 I error is greater when kinship estimates are imprecise or when there is insufficient variation in  
462 kinship among dyads (Csilléry et al. 2006). Although genetic and genomic data is becoming  
463 cheaper, easier, and more available (Städele and Vigilant 2016), kinship estimates based on  
464 genetic data can still be quite imprecise (Csilléry et al. 2006; Pemberton 2008; van Horn et al.  
465 2008). Second, relatedness estimates become severely biased using allele frequencies calculated  
466 from only a few animals (Wang 2017). If genetic samples are used to score relatedness in a small  
467 subset of individuals, it is crucial to calculate the baseline population allele frequencies from a  
468 much larger sample. Third, in studies using pedigrees based on births, ‘kinship’ is actually  
469 maternal kinship. These estimates may be ecologically valid if the animals themselves cannot

470 recognize paternal kin, but increasing evidence suggests that some primates for instance can  
471 recognize unfamiliar paternal kin (Charpentier et al. 2007; Levréro et al. 2015).

472 Association rates might mask evidence for nepotism when association is kin-biased and  
473 both association and kinship are tested as simultaneous predictors of helping rates. Although  
474 helping rates are often imprecise, association rates might often be more precise than kinship  
475 estimates when dyadic association rates are based on automated methods that can involve many  
476 thousands of observations (Alarcón-Nieto et al. 2018; Aplin et al. 2015). In such cases, the social  
477 networks could be described more accurately than the genetic relationships, and association will  
478 be easier to detect than kinship as a predictor of cooperation.

479

480 *Quantifying if and how nepotism contributes to symmetrical helping in network data*

481 If both reciprocity and nepotism exist, decomposing the inclusive fitness benefits of a  
482 cooperative trait into the relative fitness and indirect fitness components is probably implausible  
483 using empirical data. On the other hand, controlled experiments can identify proximate  
484 mechanisms by identifying the relative importance of different conflicting cues used to make  
485 helping decisions (Schweinfurth and Taborsky 2018b). Observational studies can also play an  
486 important role in looking at what proximate factors best predict cooperation in nature. Quite  
487 different proximate mechanisms can lead to the same pattern of symmetry and kinship bias in a  
488 given system, and investigating how cooperation network structures arise could help with  
489 distinguishing between possible mechanisms. For example, in one scenario kinship could  
490 determine proximity and proximity could then drive symmetrical grooming. Alternatively,  
491 individuals might associate in space independent of kinship and preferentially groom their kin.  
492 Recent developments in social network analysis (Farine and Whitehead 2015) and null models  
493 (Farine 2017) provide potentially useful tools for distinguishing mechanisms by constructing  
494 different mechanistic networks (Ilany and Akcay 2016; VanderWaal et al. 2014) or by  
495 constructing different null models that allow different aspects of associations to vary (Farine et al.

496 2015). Linking these models to tests of symmetry and kinship bias could yield greater insights  
497 into whether kinship or past experience shape patterns of helping directly or via proximity (Puga-  
498 Gonzalez et al. 2015).

499 Ultimately, patterns generated by reciprocal helping should have a temporal signature in  
500 that helping given should reflect some degree of helping received in the past. However, as we  
501 noted above, a major challenge is determining over what timeframe reciprocity takes place in a  
502 stable cooperative relationship. Few studies to date are likely to have a sufficiently complete  
503 dataset of helping behaviors to use temporal analyses. However, once such data are available,  
504 temporal social network analysis (Blonder et al. 2012; Farine 2018; Pinter-Wollman et al. 2013)  
505 could provide useful tools for investigating these topics.

506

#### 507 *Practical recommendations*

508 When testing simultaneously for evidence of nepotism and reciprocity in cooperation  
509 networks, researchers should be aware of the necessity to estimate the reliability of estimates of  
510 both kinship and helping rates (the network edge weights) before comparing their relative  
511 importance. The most obvious way to improve inferences is to collect more interactions and to  
512 estimate kinship using more pedigree or genetic data. Adding more individuals, however, cannot  
513 compensate for a lack of repeated measures of the same individuals, which is what determines the  
514 precision of network edge weights (Farine & Strandburg-Peshkin 2015). One way to increase  
515 such repeated measures is to induce acts of cooperation. For example allogrooming can be  
516 induced by applying substances to the fur (Hemelrijk 1994; Schweinfurth et al. 2017b),  
517 cooperative mobbing can be induced with fake predators (Krama et al. 2012; Krams et al. 2010;  
518 Krams et al. 2013; Krams et al. 2008), food sharing can be induced by fasting individuals (Carter  
519 and Wilkinson 2013; Wilkinson 1984) or by creating opportunities to provide (Silk et al. 2013).

520 We used network permutations which account for the network structure and hold the total  
521 help given and received by each individual constant. Alternate versions of our analyses suggested

522 that the multiple regression quadratic assignment procedure we used here (Dekker et al. 2007) is  
523 better at reducing collinearity, and hence the masking of symmetry, compared to permutation  
524 tests applied to standard multiple linear regression coefficients. However, network permutations  
525 do not account for biased sampling, so the helping rates (network edge weights) must take into  
526 account the relative opportunity for individuals to help each other. We accomplished this by  
527 defining edge weights as the proportion of help received from individual X divided by the total  
528 help received from all other individuals that could have otherwise come from individual X  
529 because X was present at the time. Another possibility is to define edges as the help from X over  
530 the opportunity for X to help. If helping events are scored as yes/no events, then an even more  
531 rigorous approach is to use pre-network permutations (Farine 2017), where the helping acts in the  
532 dataset are permuted across individuals present at the time, rather than permuting the helping  
533 rates in the network. Pre-network permutations allow for precise control over the null hypothesis  
534 by swapping within time periods or locations, and also control for biased sampling; however, they  
535 are most appropriate when the helping events are binary (0/1) and hence interchangeable.

536 In conclusion, because nepotism masks evidence of reciprocity in cooperation networks,  
537 it is useful to assess the reliability of symmetry and kinship bias as a function of sampling effort.  
538 We provide R code (Carter et al. 2018) to produce plots that allow one to assess the relative  
539 power for detecting evidence of nepotism and reciprocity in simulated datasets or in a given  
540 dataset of helping observations in humans or nonhuman animals.

541

## 542 **Acknowledgements**

543 We thank Erol Akçay, Jorg Massen, and an anonymous reviewer for constructive  
544 feedback which improved the manuscript. We thank the Rome Zoo (Bioparco) for allowing us to  
545 study their Japanese macaque and mandrill colonies, and Francesca Lasio and Raffaella Ventura  
546 for help with the data collection. GGC was supported by fellowships from the Smithsonian  
547 Institute and the Humboldt Foundation. DRF was funded by the Max Planck Society.

548

549

## References

550

551 Abernethy, K. A., L. J. White, and E. J. Wickings. 2002. Hordes of mandrills (*Mandrillus*  
552 *sphinx*): extreme group size and seasonal male presence. *Journal of Zoology*  
553 258:131-137.

554 Alarcón-Nieto, G., J. M. Graving, J. A. Klarevas-Irby, A. A. Maldonado-Chaparro, I.  
555 Mueller, and D. R. Farine. 2018. An automated barcode tracking system for  
556 behavioural studies in birds. *Methods in Ecology and Evolution* 9:1536-1547.

557 Aplin, L. M., D. R. Farine, J. Morand-Ferron, A. Cockburn, A. Thornton, and B. C.  
558 Sheldon. 2015. Experimentally induced innovations lead to persistent culture via  
559 conformity in wild birds. *Nature* 518:538-541.

560 Axelrod, R., and W. D. Hamilton. 1981. The evolution of cooperation. *Science* 211:1390-  
561 1396.

562 Balasubramaniam, K. N., B. A. Beisner, C. M. Berman, A. De Marco, J. Duboscq, S.  
563 Koirala, B. Majolo et al. 2018. The influence of phylogeny, social style, and  
564 sociodemographic factors on macaque social network structure. *American Journal*  
565 *of Primatology* 80.

566 Blonder, B., T. W. Wey, A. Dornhaus, R. James, and A. Sih. 2012. Temporal dynamics  
567 and network analysis. *Methods in Ecology and Evolution* 3:958-972.

568 Borgeaud, C., and R. Bshary. 2015. Wild vervet monkeys trade tolerance and specific  
569 coalitionary support for grooming in experimentally induced conflicts. *Current*  
570 *Biology* 25:3011-3016.

571 Bret, C., C. Sueur, B. Ngoubangoye, D. Verrier, J.-L. Deneubourg, and O. Petit. 2013.  
572 Social structure of a semi-free ranging group of mandrills (*Mandrillus sphinx*): a  
573 social network analysis. *PLOS One* 8:e83015.

574 Bshary, R., and R. Bergmüller. 2008. Distinguishing four fundamental approaches to the  
575 evolution of helping. *Journal of Evolutionary Biology* 21:405-420.

576 Carter, G., G. Schino, and D. R. Farine. 2018a. Data for "Neotism masks evidence of  
577 reciprocity in cooperation networks", Figshare.

578 Carter, G. G. 2014. The reciprocity controversy. *Animal Behavior and Cognition* 1:368-  
579 386.

580 Carter, G. G., G. Schino, and D. R. Farine. 2018b. R code for "Neotism masks evidence  
581 for reciprocity in cooperation networks", Figshare.

582 Carter, G. G., and G. S. Wilkinson. 2013. Food sharing in vampire bats: reciprocal help  
583 predicts donations more than relatedness or harassment. *Proceedings of the Royal*  
584 *Society B* 280:20122573.

585 —. 2015. Social benefits of non-kin food sharing by female vampire bats. *Proceedings of*  
586 *the Royal Society B* 282:20152524-20152524.

587 Charpentier, M. J., P. Peignot, M. Hossaert-McKey, and E. J. Wickings. 2007. Kin  
588 discrimination in juvenile mandrills, *Mandrillus sphinx*. *Animal Behaviour* 73:37-  
589 45.

590 Clutton-Brock, T. 2009. Cooperation between non-kin in animal societies. *Nature*  
591 462:51-57.

- 592 Cornwallis, C., S. West, and A. Griffin. 2009. Routes to indirect fitness in cooperatively  
593 breeding vertebrates: kin discrimination and limited dispersal. *Journal of*  
594 *Evolutionary Biology* 22:2445-2457.
- 595 Csilléry, K., T. Johnson, D. Beraldi, T. Clutton-Brock, D. Coltman, B. Hansson, G.  
596 Spong et al. 2006. Performance of marker-based relatedness estimators in natural  
597 populations of outbred vertebrates. *Genetics* 173:2091-2101.
- 598 de Waal, F. B., and M. L. Berger. 2000. Payment for labour in monkeys. *Nature* 404:563.
- 599 de Waal, F. B. M. 1997. The chimpanzee's service economy: food for grooming.  
600 *Evolution and Human Behavior* 18:375-386.
- 601 Dekker, D., D. Krackhardt, and T. A. Snijders. 2007. Sensitivity of MRQAP tests to  
602 collinearity and autocorrelation conditions. *Psychometrika* 72:563-581.
- 603 Dolivo, V., and M. Taborsky. 2015. Norway rats reciprocate help according to the quality  
604 of help they received. *Biology Letters* 11:20140959.
- 605 Farine, D. R. 2013. Animal social network inference and permutations for ecologists in  
606 Rusing asnipe. *Methods in Ecology and Evolution* 4:1187-1194.
- 607 —. 2015. Proximity as a proxy for interactions: issues of scale in social network analysis.  
608 *Animal Behaviour* 104:e1-e5.
- 609 Farine, D. R. 2017. A guide to null models for animal social network analysis. *Methods*  
610 *in Ecology and Evolution* 8:1309-1320.
- 611 Farine, D. R. 2018. When to choose dynamic vs. static social network analysis. *Journal of*  
612 *Animal Ecology* 87:128-138.
- 613 Farine, D. R., J. A. Firth, L. M. Aplin, R. A. Crates, A. Culina, C. J. Garroway, C. A.  
614 Hinde et al. 2015. The role of social and ecological processes in structuring  
615 animal populations: a case study from automated tracking of wild birds. *Royal*  
616 *Society Open Science* 2:150057.
- 617 Farine, D. R., and A. Strandburg-Peshkin. 2015. Estimating uncertainty and reliability of  
618 social network data using Bayesian inference. *Royal Society Open Science*  
619 2:150367.
- 620 Farine, D. R., and H. Whitehead. 2015. Constructing, conducting and interpreting animal  
621 social network analysis. *Journal of Animal Ecology* 84:1144-1163.
- 622 Fruteau, C., B. Voelkl, E. van Damme, and R. Noë. 2009. Supply and demand determine  
623 the market value of food providers in wild vervet monkeys. *Proceedings of the*  
624 *National Academy of Sciences of the United States of America* 106:12007-12012.
- 625 Gomes, C. M., and C. Boesch. 2009. Wild chimpanzees exchange meat for sex on a long-  
626 term basis. *PLOS One* 4:e5116.
- 627 Gomes, C. M., and C. Boesch. 2011. Reciprocity and trades in wild West African  
628 chimpanzees. *Behavioral Ecology and Sociobiology* 65:2183-2196.
- 629 Gomes, C. M., R. Mundry, and C. Boesch. 2008. Long-term reciprocation of grooming in  
630 wild West African chimpanzees. *Proceedings of the Royal Society B* 276: 699-  
631 706.
- 632 Griffin, A. S., and S. A. West. 2003. Kin discrimination and the benefit of helping in  
633 cooperatively breeding vertebrates. *Science* 302:634-636.
- 634 Hamilton, W. D. 1964. The genetical evolution of social behavior. *Journal of Theoretical*  
635 *Biology* 7:1-51.
- 636 Hemelrijk, C. K. 1994. Support for being groomed in long-tailed macaques, *Macaca*  
637 *fascicularis*. *Animal Behaviour* 48:479-481.



- 638 Ilany, A., and E. Akcay. 2016. Social inheritance can explain the structure of animal  
639 social networks. *Nature communications* 7:12084.
- 640 Jaeggi, A. V., E. De Groot, J. M. Stevens, and C. P. van Schaik. 2013. Mechanisms of  
641 reciprocity in primates: testing for short-term contingency of grooming and food  
642 sharing in bonobos and chimpanzees. *Evolution and Human Behavior* 34:69-77.
- 643 Kaburu, S. S., S. Inoue, and N. E. Newton-Fisher. 2013. Death of the alpha: within-  
644 community lethal violence among chimpanzees of the Mahale Mountains  
645 National Park. *American Journal of Primatology* 75:789-797.
- 646 Krama, T., J. Vrublevska, T. M. Freeberg, C. Kullberg, M. J. Rantala, and I. Krams.  
647 2012. You mob my owl, I'll mob yours: birds play tit-for-tat game. *Scientific*  
648 *Reports* 2:800.
- 649 Krams, I., A. Berzins, T. Krama, D. Wheatcroft, K. Igaune, and M. J. Rantala. 2010. The  
650 increased risk of predation enhances cooperation. *Proceedings of the Royal*  
651 *Society B* 277:513-518.
- 652 Krams, I., H. Kokko, J. Vrublevska, M. Abolins-Abols, T. Krama, and M. J. Rantala.  
653 2013. The excuse principle can maintain cooperation through forgivable defection  
654 in the Prisoner's Dilemma game. *Proceedings of the Royal Society B*  
655 280:20131475.
- 656 Krams, I., T. Krama, K. Igaune, and R. Mand. 2008. Experimental evidence of reciprocal  
657 altruism in the pied flycatcher. *Behavioral Ecology and Sociobiology* 62:599-605.
- 658 Kümmerli, R., A. Gardner, S. A. West, and A. S. Griffin. 2009. Limited dispersal,  
659 budding dispersal, and cooperation: an experimental study. *Evolution* 63:939-949.
- 660 Lehmann, L., and L. Keller. 2006. The evolution of cooperation and altruism - a general  
661 framework and a classification of models. *Journal of Evolutionary Biology*  
662 19:1365-1376.
- 663 Lehmann, L., L. Keller, S. A. West, and D. Roze. 2007. Group selection and kin  
664 selection: two concepts but one process. *Proceedings of the National Academy of*  
665 *Sciences of the United States of America* 104:6736-6739.
- 666 Levréro, F., G. Carrete-Vega, A. Herbert, I. Lawabi, A. Courtiol, E. Willaume, P.  
667 Kappeler et al. 2015. Social shaping of voices does not impair phenotype  
668 matching of kinship in mandrills. *Nature Communications* 6:7609.
- 669 Newton-Fisher, N. E., and S. S. Kaburu. 2017. Grooming decisions under structural  
670 despotism: the impact of social rank and bystanders among wild male  
671 chimpanzees. *Animal Behaviour* 128:153-164.
- 672 Noë, R. 2006. Cooperation experiments: coordination through communication versus  
673 acting apart together. *Animal Behaviour* 71:1-18.
- 674 Noë, R., and P. Hammerstein. 1994. Biological markets: supply and demand determine  
675 the effect of partner choice in cooperation, mutualism and mating. *Behavioral*  
676 *Ecology and Sociobiology* 35:1-11.
- 677 —. 1995. Biological markets. *Trends in Ecology and Evolution* 10:336-339.
- 678 Pemberton, J. M. 2008. Wild pedigrees: the way forward. *Proceedings of the Royal*  
679 *Society B* 275:613-621.
- 680 Pinter-Wollman, N., E. A. Hobson, J. E. Smith, A. J. Edelman, D. Shizuka, S. d. Silva, J.  
681 S. Waters et al. 2013. The dynamics of animal social networks: analytical,  
682 conceptual, and theoretical advances. *Behavioral Ecology* 25:242-255.

- 683 Port, M., D. Clough, and P. M. Kappeler. 2009. Market effects offset the reciprocation of  
684 grooming in free-ranging redfronted lemurs, *Eulemur fulvus rufus*. *Animal*  
685 *Behaviour* 77:29-36.
- 686 Puga-Gonzalez, I., A. Hoscheid, and C. K. Hemelrijk. 2015. Friendship, reciprocation,  
687 and interchange in an individual-based model. *Behavioral Ecology and*  
688 *Sociobiology*:1-12.
- 689 Rutte, C., and M. Taborsky. 2008. The influence of social experience on cooperative  
690 behaviour of rats (*Rattus norvegicus*): direct vs generalised reciprocity.  
691 *Behavioral Ecology and Sociobiology* 62:499-505.
- 692 Sabbatini, G., A. De Bortoli Vizioli, E. Visalberghi, and G. Schino. 2012. Food transfers  
693 in capuchin monkeys: an experiment on partner choice. *Biology Letters* 8:757-  
694 759.
- 695 Schino, G., and F. Aureli. 2009. Reciprocal altruism in primates: partner choice,  
696 cognition, and emotions. *Advances in the Study of Behavior* 39:45-69.
- 697 —. 2010a. A few misunderstandings about reciprocal altruism. *Communicative and*  
698 *Integrative Biology* 3:561-563.
- 699 Schino, G., and F. Aureli. 2010b. Primate reciprocity and its cognitive requirements.  
700 *Evolutionary Anthropology: Issues, News, and Reviews* 19:130-135.
- 701 —. 2010c. The relative roles of kinship and reciprocity in explaining primate altruism.  
702 *Ecology Letters* 13:45-50.
- 703 —. 2017. Reciprocity in group-living animals: Partner control versus partner choice.  
704 *Biological Reviews* 92:665-672.
- 705 Schino, G., and B. Pellegrini. 2009. Grooming in mandrills and the time frame of  
706 reciprocal partner choice. *American Journal of Primatology* 71:884-888.
- 707 Schweinfurth, M., J. Neuenschwander, L. Engqvist, K. Schneeberger, A. Rentsch, M.  
708 Gyax, and M. Taborsky. 2017a. Do female Norway rats form social bonds?  
709 *Behavioral Ecology and Sociobiology* 71:98.
- 710 Schweinfurth, M. K., B. Stieger, and M. Taborsky. 2017b. Experimental evidence for  
711 reciprocity in allogrooming among wild-type Norway rats. *Scientific Reports*  
712 7:4010.
- 713 Schweinfurth, M. K., and M. Taborsky. 2018a. Reciprocal trading of different  
714 commodities in Norway rats. *Current Biology* 28:1-6.
- 715 Schweinfurth, M. K., and M. Taborsky. 2018b. Relatedness decreases and reciprocity  
716 increases cooperation in Norway rats. *Proceedings of the Royal Society B* 285.
- 717 Seyfarth, R. M., and D. L. Cheney. 1984. Grooming, alliances and reciprocal altruism in  
718 vervet monkeys. *Nature* 308:541-543.
- 719 —. 2012. The evolutionary origins of friendship. *Annual Review of Psychology* 63:153-  
720 177.
- 721 Silk, J. B., S. F. Brosnan, J. Henrich, S. P. Lambeth, and S. Shapiro. 2013. Chimpanzees  
722 share food for many reasons: The role of kinship, reciprocity, social bonds and  
723 harassment on food transfers. *Animal Behaviour* 85:941-947.
- 724 Städele, V., and L. Vigilant. 2016. Strategies for determining kinship in wild populations  
725 using genetic data. *Ecology and Evolution* 6:6107-6120.
- 726 Taborsky, M., J. G. Frommen, and C. Riehl. 2016. Correlated pay-offs are key to  
727 cooperation. *Philosophical Transactions of the Royal Society B* 371:20150084.

- 728 Tiddi, B., F. Aureli, E. P. di Sorrentino, C. H. Janson, and G. Schino. 2011. Grooming for  
729 tolerance? Two mechanisms of exchange in wild tufted capuchin monkeys.  
730 Behavioral Ecology 22:663-669.
- 731 Trivers, R. L. 1971. The evolution of reciprocal altruism. Quarterly Review of Biology  
732 46:35-57.
- 733 Van Cleve, J., and E. Akçay. 2014. Pathways to social evolution: reciprocity, relatedness,  
734 and synergy. Evolution 68:2245-2258.
- 735 van Horn, R. C., J. Altmann, and S. C. Alberts. 2008. Can't get there from here: inferring  
736 kinship from pairwise genetic relatedness. Animal Behaviour 75:1173-1180.
- 737 VanderWaal, K. L., E. R. Atwill, L. A. Isbell, and B. McCowan. 2014. Linking social and  
738 pathogen transmission networks using microbial genetics in giraffe (*Giraffa*  
739 *camelopardalis*). Journal of animal ecology 83:406-414.
- 740 Ventura, R., B. Majolo, N. F. Koyama, S. Hardie, and G. Schino. 2006. Reciprocation  
741 and interchange in wild Japanese macaques: grooming, cofeeding, and agonistic  
742 support. American Journal of Primatology 68:1138-1149.
- 743 Wang, J. 2017. Estimating pairwise relatedness in a small sample of individuals. Heredity  
744 119:302.
- 745 West, S., A. Griffin, and A. Gardner. 2007a. Evolutionary Explanations for Cooperation.  
746 Current Biology 17:R661-R672.
- 747 West, S. A., A. S. Griffin, and A. Gardner. 2007b. Social semantics: altruism,  
748 cooperation, mutualism, strong reciprocity and group selection. Journal of  
749 Evolutionary Biology 20:415-432.
- 750 Wilkinson, G. S. 1984. Reciprocal food sharing in the vampire bat. Nature 308:181-184.
- 751 Wilkinson, G. S. 1988. Reciprocal altruism in bats and other mammals. Ethology and  
752 Sociobiology 9:85-100.
- 753 Zöttl, M., D. Heg, N. Chervet, and M. Taborsky. 2013. Kinship reduces alloparental care  
754 in cooperative cichlids where helpers pay-to-stay. Nature Communications  
755 4:1341.
- 756
- 757

## 758 Figure Legends

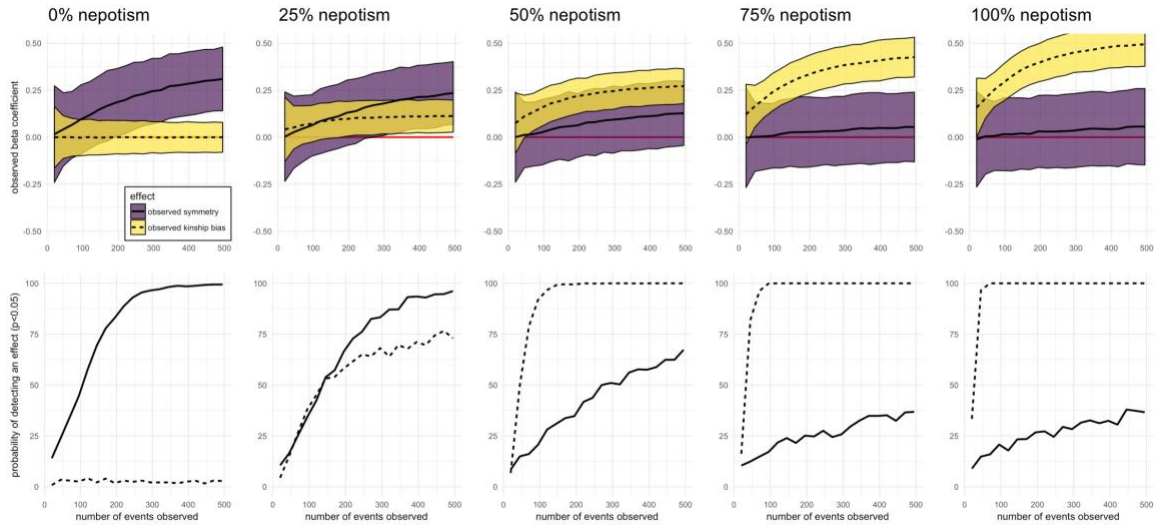

759

760 **Figure 1. Simulated data: Kinship bias masks symmetry in cooperation networks resulting**  
761 **from perfect reciprocity.** The probability and durations of help and reciprocal help are perfectly  
762 symmetrical within all dyads, and the degree of simultaneous nepotism increases from left to  
763 right. Top panels show the mean and 95% confidence interval of the standardized slope estimates  
764 for the effects of helping rate A to B (solid line, purple shading) and kinship between A and B  
765 (dotted line, yellow shading) as predictors of helping rate B to A. Bottom panels show the  
766 percentage of observed coefficients that were greater than 95% of the coefficients expected based  
767 on network permutations. Supplementary Figures S1-S5 in the appendix show plots for the null  
768 coefficients and for the probability of the observed coefficients being greater than expected  
769 coefficients.

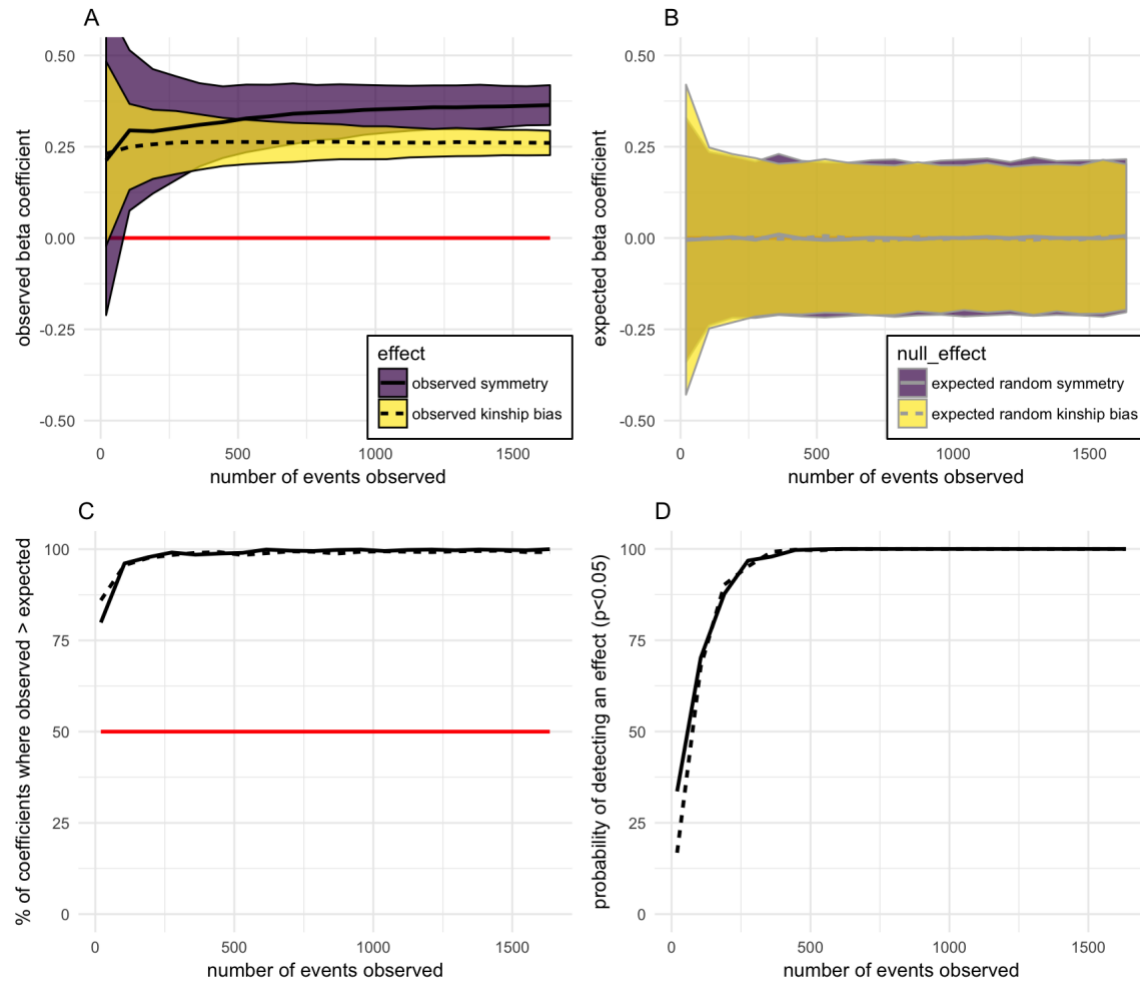

770

771 **Figure 2. Female mandrills: observed and expected symmetry and kinship bias in**

772 **allogrooming networks with increased sampling effort.** Panel A shows the mean and 95%

773 confidence interval of the standardized slope estimates for the effects of helping rate A to B (solid

774 line, purple shading) and kinship between A and B (dotted line, yellow shading) as predictors of

775 helping rate B to A. Panel B shows the same for the expected null coefficients generated by

776 permutation. Panel C shows the percentage of observed coefficients that are greater than the

777 paired null coefficient generated from the same subsample. If effects are real, then these values

778 should be higher than 50% (red line). Panel D shows the percentage of observed coefficients that

779 are greater than 95% of expected null coefficients for that sample size.

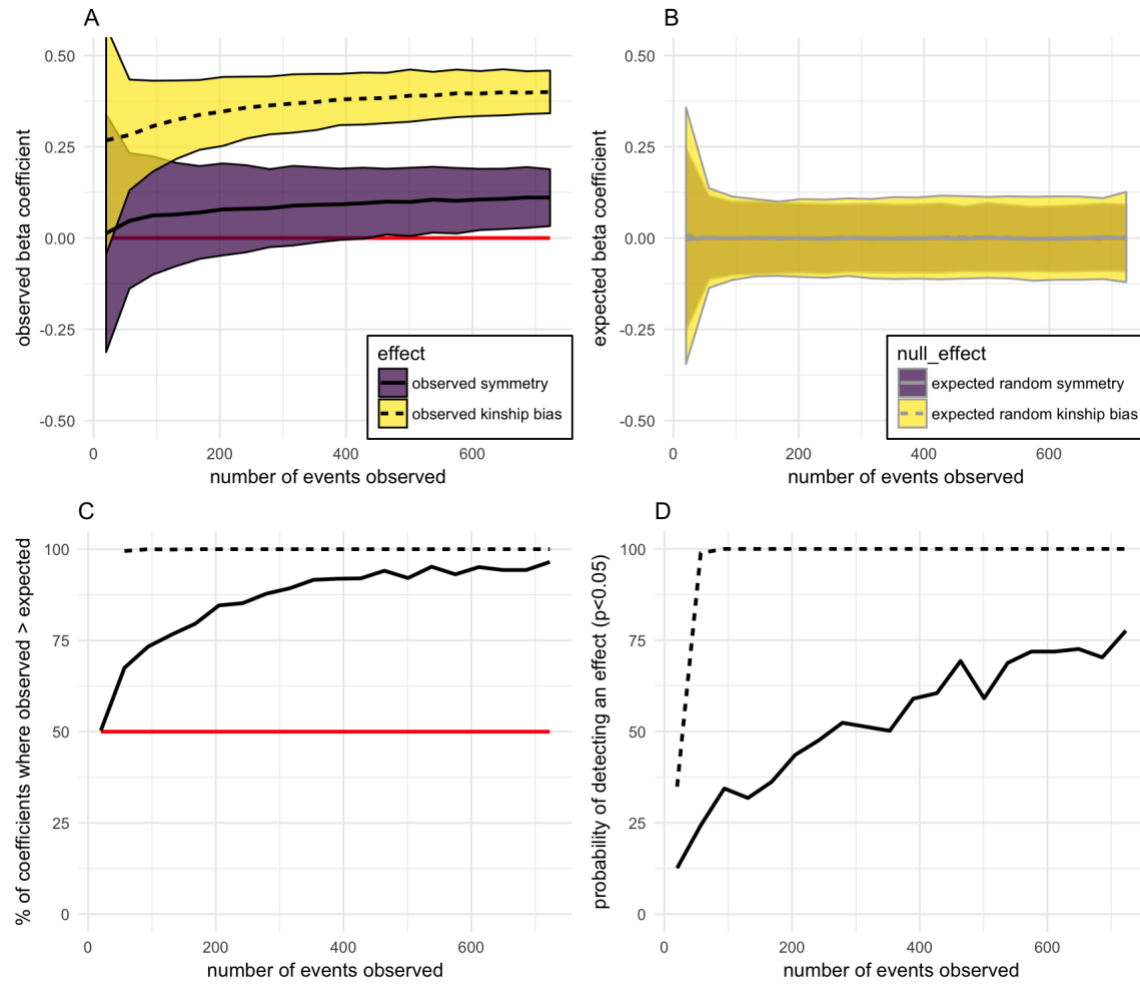

780

781 **Figure 3. Female Japanese macaques: observed and expected symmetry and kinship bias in**  
782 **food-sharing networks with increased sampling effort. See Figure 2 for explanation of plots.**

783

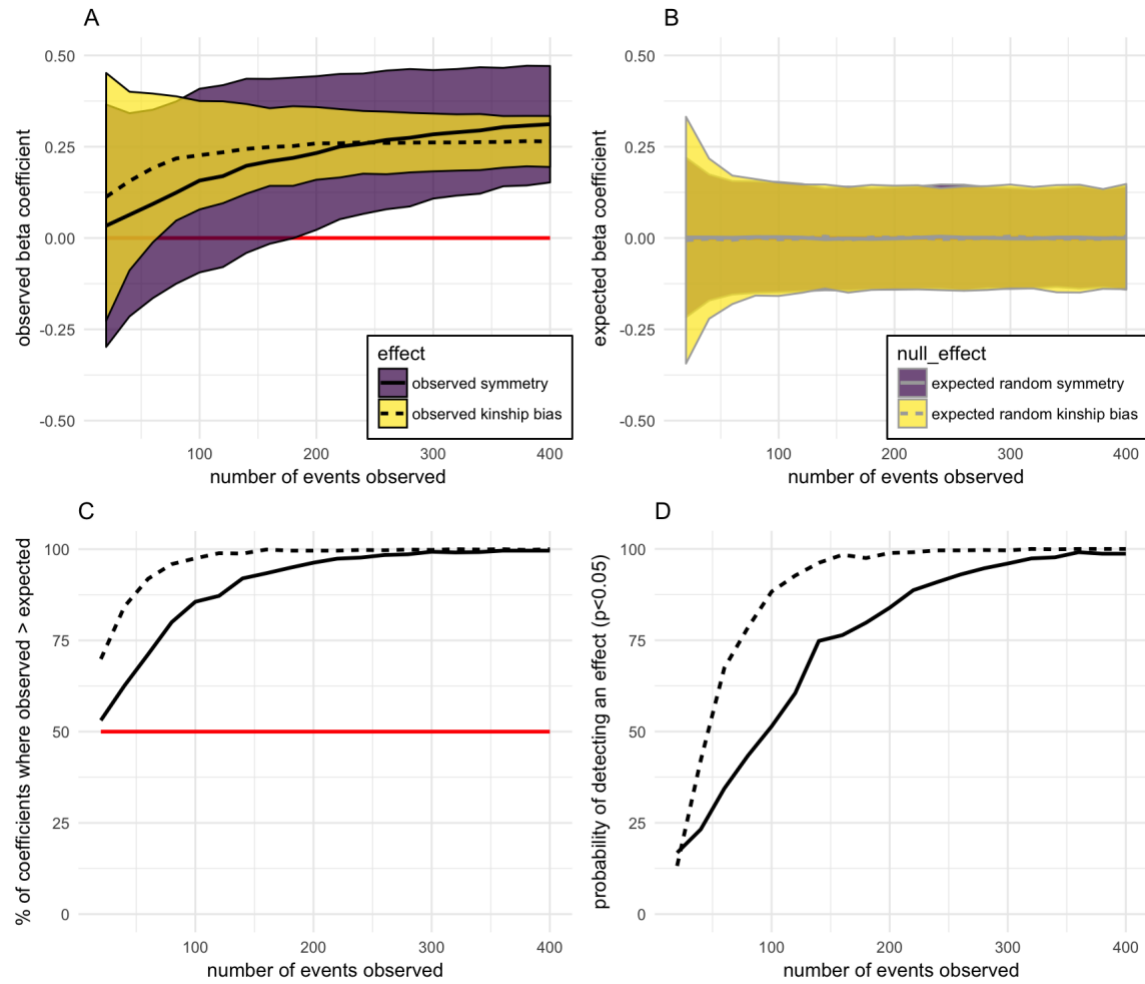

784

785 **Figure 4. Female vampire bats: observed and expected symmetry and kinship bias in food-**  
786 **sharing networks with increased sampling effort. See Figure 2 for explanation of plots.**

787
